# Supplementary material for: IL7-IL12 Engineered Mesenchymal Stem Cells (MSCs) Improve A CAR T Cell Attack Against Colorectal Cancer Cells
Source: Cells. 2020 Apr 3;9(4):873. doi: 10.3390/cells9040873 (PMC7226757; doi:10.3390/cells9040873)
Supplement: Supplementary file 1 [file cells-09-00873-s001.pdf]

### **Supplementary Methods:**

**MSC surface flow cytometric analysis** IL7/IL12 MSCs were cultivated for three to five days, harvested, split into three vials and stained with three antibody combinations: (1) isotype controls; (2) CD34, CD45, CD73, CD90, CD105; (3) CD3, CD14, CD19, CD41, CD235a. Antibodies are listed below (Supplementary Table 1). Flow cytometric analysis was performed with a MACSQuant® system (Miltenyi Biotec). Supplementary Figure 1 shows an excerpt of data.

**MSC differentiation**  $60 \times 10^4$  native or IL7/IL12 transduced MSCs were seeded in each well of a 24-well plate. For adipogenic or osteogenic differentiation, MSCs were cultured for two to three weeks in StemMACS OsteoDiff medium (Miltenyi Biotech) or StemMACS AdipoDiff medium (Miltenyi Biotech), respectively, according to the manufacturer's instructions. After differentiation, cells were fixed with 10% formaldehyde and adipocytes were stained with Oil Red (Sigma Aldrich), while osteocytes were stained with Alzerin Red (Sigma Aldrich).

**Table S1.** Antibodies for characterization of MSCs.

| Antibody                      | Manufacturer     | Clone       |
|-------------------------------|------------------|-------------|
| CD3-PC7                       | Becton Dickinson | SK7 (Leu-4) |
| CD14-APC                      | eBioscience      | 61D3        |
| CD19-APC-Vio770               | Miltenyi Biotec  | LT19        |
| CD34-PC7                      | Becton Dickinson | 8G12        |
| CD41a-PE                      | Becton Dickinson | HIP8        |
| CD45-FITC                     | Becton Dickinson | 2D1         |
| CD73-APC                      | Becton Dickinson | AD2         |
| CD90-APC-Vio770               | Miltenyi Biotec  | DG3         |
| CD105-PE                      | Becton Dickinson | 266         |
| Glycophorin A- PE (CD235a-PE) | R&D Systems      | R10         |
| IgG1-APC                      | Becton Dickinson | MOPC-21     |
| IgG1-APC-Vio770               | Miltenyi Biotec  | IS5-21F5    |
| IgG1-FITC                     | Becton Dickinson | MOPC-21     |
| IgG1-PE                       | Becton Dickinson | MOPC-21     |
| IgG1-PC7                      | Becton Dickinson | MOPC-21     |

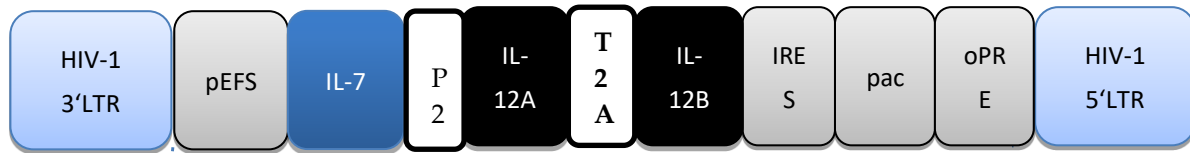

**Figure S1.** Transgene cassette EFS\_IL-7\_P2A\_IL-12A T2A\_IL12b\_IRES\_pac. LTR: HIV-1 derived long terminal repeats, pEFS: short intron-less form of elongation factor 1 alpha 1 (EF1a) promoter, IL-7: Interleukin-7 cDNA sequence, IL-12A: Interleukin 12 p35 subunit cDNA sequence, IL-12B: Interleukin p40 cDNA sequence, P2A and T2A: self cleaving elements, IRES: internal ribosomal entry site, pac: Puromycin-N-acetyltransferase, oPRE: woodchuck hepatitis post-transcriptional regulatory element.

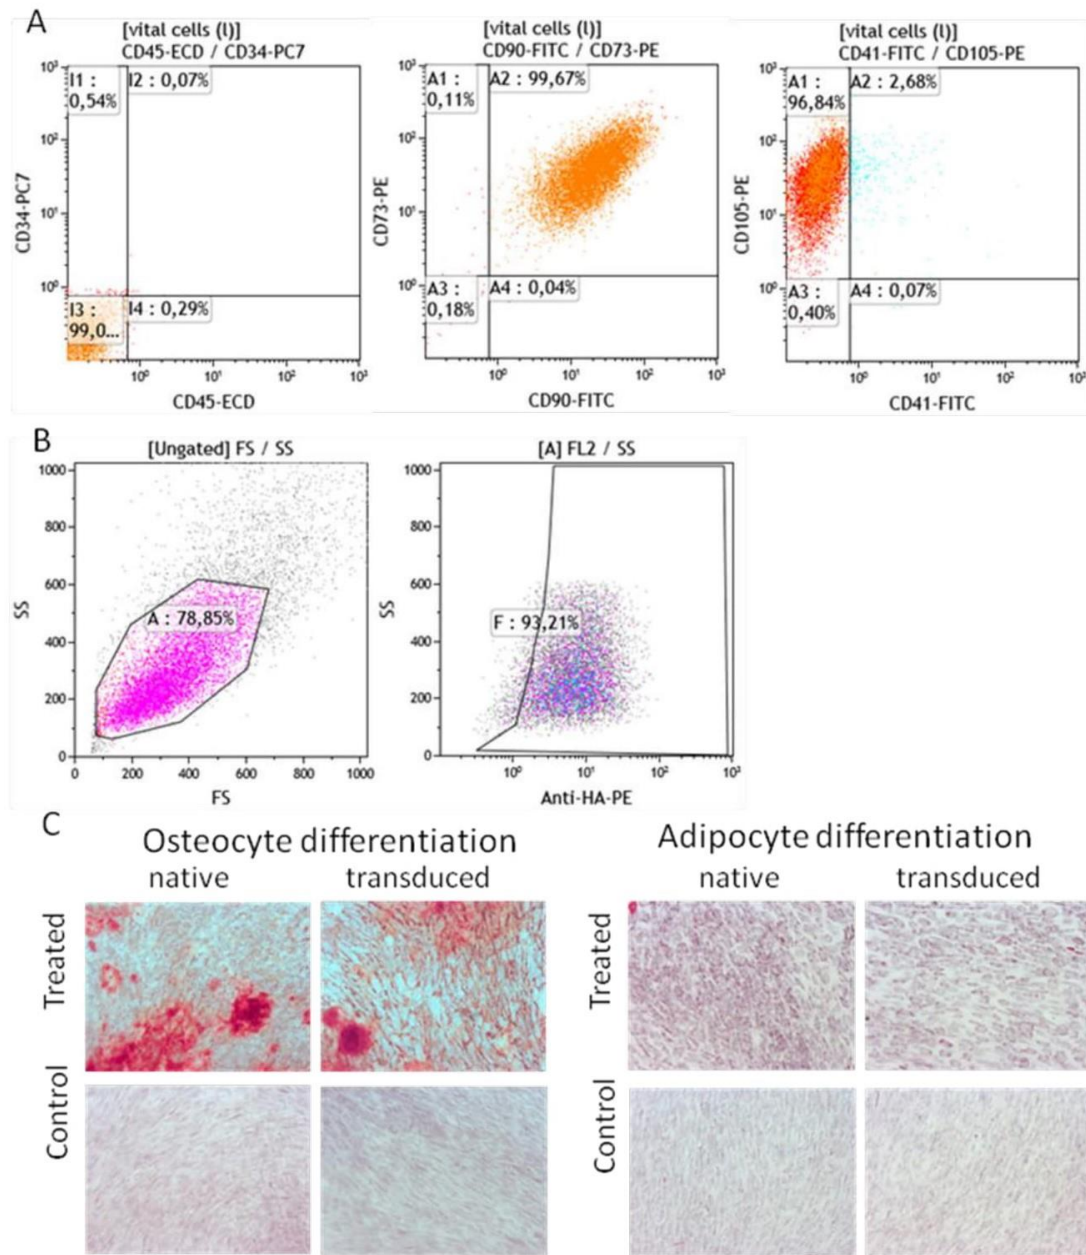

**Figure S2.** Characterization of IL7/IL12 transduced MSC. (A) Surface marker expression of IL7/IL12 transduced MSCs was analysed by flow cytometry as described in supplemental materials and methods (B) Intracellular FACS analysis of puromycin selected IL7/IL12 MSCs utilizing an anti-HA PE mAb for detection of recombinant cytokines (C) 60×10<sup>4</sup> native or IL7/IL12 transduced MSCs were seeded in each well of a 24-well plate. For adipogenic or osteogenic differentiation, MSCs were cultured for two to three weeks in StemMACS OsteoDiff medium (Miltenyi manufacturer's instructions). After differentiation, cells were fixed with 10% formaldehyde and adipocytes were stained with Oil Red (Sigma Aldrich), while osteocytes were stained with Alzerin Red (Sigma Aldrich).

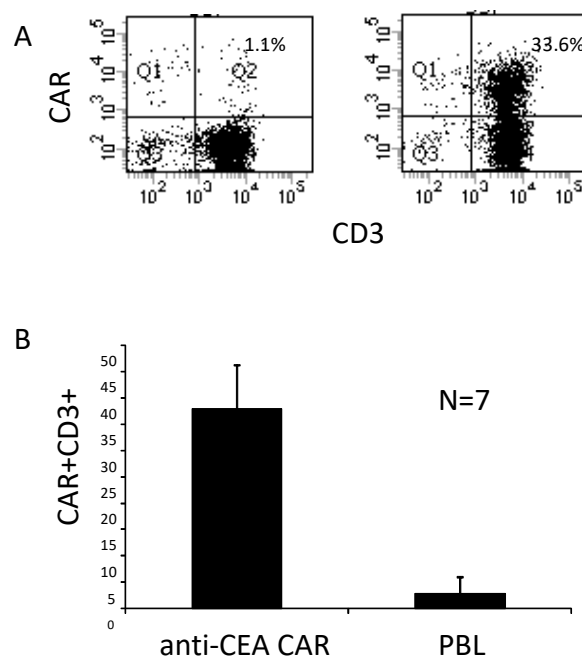

**Figure S3.** Expression of anti-CEA CAR in T cells from the peripheral blood. Density centrifugation isolated T cells from the peripheral blood of healthy donors were activated, cultivated and infected with retroviral vector encoding the anti-CEA CAR as described in Materials and Methods. T cells with CAR expression were identified by flow cytometry with anti-CD3 and anti-human IgG antibodies against the constant domain of the CAR. (A) Dot blot of a typical experiment; (B) mean values  $\pm$  SD of 7 randomly selected blood donors.
